# Supplementary material
Source: PubMed Central journal article supplement (PMC4638172)
Supplement: NIHMS734400-supplement-Supplemental_Docs.pdf [file NIHMS734400-supplement-Supplemental_Docs.pdf]

***Helicobacter pylori* chronic infection and mucosal inflammation switches the human gastric glycosylation pathways**

Ana Magalhães, Ricardo Marcos-Pinto, Alison V. Nairn, Mitche dela Rosa, Rui M. Ferreira, Susana Junqueira-Neto, Daniela Freitas, Joana Gomes, Patrícia Oliveira, Marta R. Santos, Nuno T. Marcos, Wen Xiaogang, Céu Figueiredo, Carla Oliveira, Mário Dinis-Ribeiro, Fátima Carneiro, Kelley W. Moremen, Leonor David, Celso A. Reis

**Supplementary data**

**List**

Supplementary Table 1

Supplementary Table 2

Supplementary Table 3

Supplementary Figure 1

**Supplementary Table 1** – Individual features, histopathological data of gastric biopsies and genetic characteristics of *H. pylori* infecting strains.

| Case | Code <sup>A</sup> | Sex | Age | Region   | <i>H. pylori</i> | IgG/IgA <sup>B</sup> | <i>cagA</i> <sup>C</sup> | Sialyl-Le <sup>a</sup> | Sialyl-Le <sup>x</sup> | Inflammation    | PMN infiltration | Atrophy         | RNA analysis group |
|------|-------------------|-----|-----|----------|------------------|----------------------|--------------------------|------------------------|------------------------|-----------------|------------------|-----------------|--------------------|
| 1    | C                 | M   | 25  | Antrum   | -                | 2.7/0.8              | .                        | -                      | -                      | absent/mild     | absent/mild      | absent/mild     |                    |
| 2    | C                 | F   | 59  | Antrum   | +                | 197.7/2.2            | <i>cagA</i> +            | +                      | +                      | absent/mild     | absent/mild      | absent/mild     |                    |
| 3    | C                 | F   | 48  | Antrum   | +                | 166.7/3.0            | <i>cagA</i> +            | -                      | +                      | absent/mild     | absent/mild      | absent/mild     |                    |
| 4    | C                 | M   | 45  | Incisura | +                | 68.1/1.2             | <i>cagA</i> +            | +                      | +                      | absent/mild     | absent/mild      | absent/mild     |                    |
| 5    | C                 | M   | 32  | Antrum   | +                | 596/7.5              | <i>cagA</i> +            | +                      | +                      | moderate/severe | absent/mild      | absent/mild     | Hp+                |
| 6    | C                 | M   | 22  | Antrum   | -                | 12.0/0.5             | .                        | -                      | -                      | absent/mild     | absent/mild      | absent/mild     | Hp-                |
| 7    | C                 | M   | 64  | Antrum   | +                | 1181/1.9             | <i>cagA</i> +            | +                      | +                      | moderate/severe | absent/mild      | absent/mild     | Hp+                |
| 8    | C                 | M   | 37  | Antrum   | +                | 170.6/1.3            | <i>cagA</i> +            | -                      | -                      | absent/mild     | absent/mild      | absent/mild     |                    |
| 9    | C                 | F   | 26  | Antrum   | +                | 688/2.5              | <i>cagA</i> -            | -                      | -                      | moderate/severe | moderate/se      | absent/mild     | Hp+                |
| 10   | C                 | M   | 62  | Incisura | +                | 1281/9.8             | <i>cagA</i> +            | +                      | +                      | moderate/severe | moderate/se      | moderate/severe | Hp+                |
| 11   | C                 | M   | 20  | Antrum   | -                | 6.9/1.3              | .                        | -                      | -                      | absent/mild     | absent/mild      | absent/mild     | Hp-                |
| 12   | C                 | F   | 61  | Antrum   | +                | 179/5.5              | <i>cagA</i> -            | +                      | +                      | moderate/severe | moderate/se      | moderate/severe | Hp+                |
| 13   | C                 | F   | 50  | Antrum   | +                | 183/4.9              | <i>cagA</i> +            | +                      | +                      | moderate/severe | moderate/se      | absent/mild     | Hp+                |
| 14   | C                 | F   | 40  | Antrum   | +                | 524/2.9              | <i>cagA</i> +            | +                      | +                      | moderate/severe | absent/mild      | moderate/severe | Hp+                |
| 15   | C                 | F   | 46  | Antrum   | +                | 74.9/1.9             | <i>cagA</i> -            | +                      | +                      | moderate/severe | absent/mild      | absent/mild     | Hp+                |
| 16   | C                 | M   | 57  | Antrum   | +                | 183/5.2              | <i>cagA</i> +            | +                      | +                      | moderate/severe | moderate/se      | moderate/severe | Hp+                |
| 17   | C                 | M   | 53  | Antrum   | -                | 8.1/0.7              | .                        | -                      | -                      | absent/mild     | absent/mild      | absent/mild     | Hp-                |
| 18   | C                 | M   | 43  | Antrum   | -                | 11.6/3.1             | .                        | +                      | +                      | absent/mild     | absent/mild      | absent/mild     | Hp-                |
| 19   | C                 | F   | 35  | Antrum   | +                | 170.9/3.8            | <i>cagA</i> +            | +                      | +                      | moderate/severe | moderate/se      | absent/mild     | Hp+                |
| 20   | C                 | F   | 38  | Antrum   | +                | >200/4.0             | <i>cagA</i> +            | +                      | +                      | moderate/severe | moderate/se      | absent/mild     | Hp+                |
| 21   | C                 | F   | 53  | Antrum   | +                | 166.7/2.8            | nd                       | +                      | +                      | moderate/severe | moderate/se      | absent/mild     |                    |
| 22   | C                 | M   | 33  | Antrum   | -                | 7.6/0.6              | .                        | -                      | -                      | absent/mild     | absent/mild      | absent/mild     | Hp-                |
| 23   | C                 | F   | 37  | Antrum   | +                | 286/7.7              | <i>cagA</i> +            | +                      | +                      | moderate/severe | moderate/se      | absent/mild     | Hp+                |
| 24   | C                 | F   | 20  | Antrum   | +                | 76.2/0.8             | <i>cagA</i> -            | +                      | +                      | moderate/severe | absent/mild      | absent/mild     | Hp+                |
| 25   | C                 | F   | 18  | Antrum   | -                | 26.7/1.7             | .                        | -                      | -                      | absent/mild     | absent/mild      | absent/mild     | Hp-                |
| 26   | C                 | F   | 22  | Antrum   | +                | 122.8/0.8            | <i>cagA</i> -            | +                      | +                      | moderate/severe | moderate/se      | absent/mild     | Hp+                |
| 27   | S                 | M   | 39  | Antrum   | +                | >2000/7.2            | <i>cagA</i> +            | +                      | +                      | moderate/severe | moderate/se      | absent/mild     |                    |
| 28   | S                 | M   | 31  | Antrum   | -                | 3.3/0.0              | .                        | -                      | -                      | absent/mild     | absent/mild      | absent/mild     |                    |
| 29   | S                 | F   | 50  | Antrum   | -                | 10.8/1.3             | .                        | -                      | +                      | absent/mild     | absent/mild      | absent/mild     | Hp-                |
| 30   | S                 | F   | 46  | Antrum   | +                | 502/2.2              | <i>cagA</i> +            | +                      | +                      | moderate/severe | moderate/se      | moderate/severe |                    |
| 31   | S                 | M   | 35  | Antrum   | +                | 1265/2.3             | <i>cagA</i> +            | +                      | +                      | moderate/severe | absent/mild      | moderate/severe |                    |
| 32   | S                 | F   | 39  | Antrum   | -                | 135/3.1              | .                        | -                      | -                      | absent/mild     | absent/mild      | absent/mild     |                    |
| 33   | S                 | M   | 56  | Antrum   | -                | 6.0/0.7              | .                        | -                      | -                      | absent/mild     | absent/mild      | absent/mild     |                    |
| 34   | S                 | M   | 59  | Antrum   | +                | 1902/6.6             | <i>cagA</i> +            | +                      | +                      | moderate/severe | moderate/se      | absent/mild     | Hp+                |
| 35   | S                 | M   | 59  | Antrum   | -                | 4.2/0.5              | .                        | +                      | +                      | absent/mild     | absent/mild      | absent/mild     |                    |
| 36   | S                 | F   | 37  | Antrum   | -                | 24.1/2.0             | .                        | -                      | -                      | absent/mild     | absent/mild      | absent/mild     |                    |
| 37   | S                 | F   | 50  | Antrum   | -                | 4.2/05               | .                        | -                      | +                      | absent/mild     | absent/mild      | absent/mild     | Hp-                |
| 38   | S                 | M   | 46  | Antrum   | +                | 136/2.7              | <i>cagA</i> +            | +                      | +                      | moderate/severe | absent/mild      | absent/mild     |                    |
| 39   | S                 | F   | 64  | Antrum   | +                | 275/7.6              | nd                       | +                      | +                      | absent/mild     | absent/mild      | absent/mild     |                    |
| 40   | D                 | M   | 39  | Antrum   | +                | 123/7.8              | <i>cagA</i> +            | -                      | -                      | absent/mild     | absent/mild      | absent/mild     |                    |
| 41   | D                 | M   | 36  | Antrum   | +                | 89/2.3               | <i>cagA</i> +            | +                      | +                      | moderate/severe | moderate/se      | moderate/severe |                    |
| 42   | D                 | M   | 45  | Antrum   | -                | 7.1/2.1              | .                        | -                      | -                      | absent/mild     | absent/mild      | absent/mild     |                    |
| 43   | D                 | M   | 32  | Antrum   | -                | 5.0/0.8              | .                        | -                      | -                      | absent/mild     | absent/mild      | absent/mild     |                    |
| 44   | D                 | F   | 65  | Antrum   | -                | 2.1/1.1              | .                        | -                      | -                      | absent/mild     | absent/mild      | absent/mild     |                    |
| 45   | D                 | F   | 57  | Antrum   | +                | 65/5.3               | <i>cagA</i> +            | -                      | -                      | absent/mild     | absent/mild      | absent/mild     |                    |
| 46   | S                 | F   | 35  | Antrum   | +                | 52.7/1.7             | <i>cagA</i> -            | +                      | +                      | moderate/severe | moderate/se      | absent/mild     | Hp+                |
| 47   | N                 | F   | 28  | Antrum   | +                | 77/2,5               | <i>cagA</i> +            | +                      | +                      | absent/mild     | absent/mild      | absent/mild     |                    |
| 48   | N                 | F   | 39  | Antrum   | +                | 200/2,4              | <i>cagA</i> +            | +                      | +                      | moderate/severe | moderate/se      | absent/mild     |                    |
| 49   | N                 | M   | 46  | Antrum   | +                | 200/0,8              | <i>cagA</i> +            | +                      | +                      | absent/mild     | absent/mild      | absent/mild     |                    |
| 50   | N                 | F   | 39  | Antrum   | +                | 200/7,5              | <i>cagA</i> +            | +                      | -                      | moderate/severe | moderate/se      | moderate/severe |                    |

<sup>A</sup> Codification for individual's identification: C-first degree relative of patients with early-onset gastric carcinoma; S-spouses; D-dyspeptic patients and N-neighbors; <sup>B</sup> anti-*H. pylori* IgG/IgA serological values; <sup>C</sup> n.d.- not determined.

**Supplementary Table 2** - Primer sequences for qRT-PCR analysis of gene expression.

| <b>Gene</b>                    | <b>Accession #</b> | <b>Forward Primer (5' to 3')</b> | <b>Reverse Primer (5' to 3')</b> |
|--------------------------------|--------------------|----------------------------------|----------------------------------|
| <i>B3GALT5</i>                 | NM_006057          | CTCCGTATGCCTCTTCAGGA             | GCCTGCCAGTAGTCCAAGAG             |
| <i>B3GNT1</i>                  | NM_006876          | GAAGCGTTGAAGTTCATCC              | TGTTTGAAGTGGCGATATAGGA           |
| <i>B3GNT2</i>                  | NM_006577          | TGCCAAAGTCTATGAGGCATC            | ACAGAGGCCCATGAACACAT             |
| <i>B3GNT3</i>                  | NM_014256          | AGGCACAGACTCACGGAGAC             | GAGCGTGAGGTTGAAGAAGG             |
| <i>B3GNT4</i>                  | NM_030765          | CTAGCCGTCACCGTCTCTTC             | TGAAGGCTCCAGCAAGATAGA            |
| <i>B3GNT5</i>                  | NM_032047          | TGCCAAAGTCTATGAGGCATC            | ACAGAGGCCCATGAACACAT             |
| <i>ST3GAL1</i>                 | NM_003033          | ATTGAGCCTCCACCTCTGG              | CACGATGGGTAGCAGGAAGT             |
| <i>ST3GAL2</i>                 | NM_006927          | TGGTTTGACAGCCACTTTGA             | CGGTGGAAGATCCATGTTCT             |
| <i>ST3GAL3</i>                 | NM_006279          | ACACTGCGCATCACCTACC              | GAGAGAATCGCGCTCGTACT             |
| <i>ST3GAL4</i>                 | NM_006278          | CGTCCTGGTAGCTTTCAAGG             | GCACCCGCTTCTTATCACTC             |
| <i>ST3GAL5</i>                 | NM_003896          | CAACGGAAACCAAGTTCCTCT            | CACGATCAATGCCTCCACT              |
| <i>ST3GAL6</i>                 | NM_006100          | CCTAAACACCCAACAACAGGA            | CCAGCTAGGTGAACTTCGTGA            |
| <i>FUT2</i>                    | NM_000511          | GATTCAAGCCATGTGGGAGT             | GTCCAGTGCCTTTGATGTT              |
| <i>FUT3</i>                    | NM_000149          | CGCTGGATCTGGTTCAACTT             | GTATCTGTCCAGGGCTTCCA             |
| <i>FUT4</i>                    | NM_002033          | TGGCCCGCTACAAGTTCTAC             | GCCAGAGCTTCTCGGTGATA             |
| <i>FUT6</i>                    | NM_000150          | CTGCTGATGGCTGTGTGTTT             | GGGTACACAGTGGGATCGTC             |
| <i>FUT9</i>                    | NM_006581          | CTTACCGCCGTGATTCAGAT             | AAACACGAAGGGATTTGTGC             |
| <i>FUT10</i>                   | NM_032664          | TATGTTTCGCGAGCTGATGAC            | TGAGGGAGGTCTTTGTTTCG             |
| <i>FUT11</i>                   | NM_173540          | AGTCTGAAGCATCGGGAGTG             | TCGAAGCCGTTGAGGTAGTT             |
| <i>IL-8</i>                    | NM_000584          | AAGACATACTCCAAACCTTTCCA          | GGTCCACTCTCAATCACTCTCA           |
| <i>IL-6</i>                    | NM_000600          | CTTCCCTGCCCCAGTACC               | GGTGAGTGGCTGTCTGTGTG             |
| <i>IL-1<math>\beta</math></i>  | NM_000576          | GCTGAGGAAGATGCTGGTTC             | TGAAGGGAAAGAAGGTGCTC             |
| <i>TNF-<math>\alpha</math></i> | NM_000594          | CCTCTTCTCCTTCTGATCGT             | ATCACTCCAAAGTGCAGCAG             |
| <i>IFN-<math>\gamma</math></i> | NM_000619          | CAGCAGCTAAAACAGGGAAGC            | CTGGGATGCTCTTCGACCTC             |
| <i>KRT18</i>                   | NM_000224          | GAACGAGAAGGAGACCATGC             | AGGCTCCTCACTCTGTCCAG             |

**Supplementary table 3**– Sialyl-Le<sup>a</sup> and sialyl-Le<sup>x</sup> expression and histopathological features.

|                                                    | Sialyl-Le <sup>a</sup> |                   |                      | Sialyl-Le <sup>x</sup> |                   |                      |
|----------------------------------------------------|------------------------|-------------------|----------------------|------------------------|-------------------|----------------------|
|                                                    | Negative<br>n (%)      | Positive<br>n (%) | p-value <sup>C</sup> | Negative<br>n (%)      | Positive<br>n (%) | p-value <sup>C</sup> |
| <b><i>H. pylori</i></b>                            |                        |                   |                      |                        |                   |                      |
| negative (n=17)                                    | 15<br>(88%)            | 2<br>(12%)        | <0.0001              | 13<br>(76%)            | 4<br>(24%)        | <0.0001              |
| positive (n=33)                                    | 5<br>(15%)             | 28<br>(85%)       |                      | 5<br>(15%)             | 28<br>(85%)       |                      |
| <b><i>cagA</i> status<sup>A</sup></b>              |                        |                   |                      |                        |                   |                      |
| negative (n=6)                                     | 1<br>(17%)             | 5<br>(83%)        | n.s.                 | 1<br>(17%)             | 5<br>(83%)        | n.s.                 |
| positive (n=25)                                    | 4<br>(16%)             | 21<br>(84%)       |                      | 4<br>(16%)             | 21<br>(84%)       |                      |
| <b>Chronic inflammatory infiltrate<sup>B</sup></b> |                        |                   |                      |                        |                   |                      |
| absent/mild (n= 9)                                 | 4<br>(44%)             | 5<br>(56%)        | 0.0133               | 3<br>(33%)             | 6<br>(67%)        | n.s.                 |
| moderate/severe (n=24)                             | 1<br>(4%)              | 23<br>(96%)       |                      | 2<br>(8%)              | 22<br>(92%)       |                      |
| <b>Inflammatory activity<sup>B</sup></b>           |                        |                   |                      |                        |                   |                      |
| absent/mild (n=16)                                 | 4<br>(25%)             | 12<br>(75%)       | n.s.                 | 3<br>(19%)             | 13<br>(81%)       | n.s.                 |
| moderate/severe (n=17)                             | 1<br>(6%)              | 16<br>(94%)       |                      | 2<br>(12%)             | 15<br>(88%)       |                      |
| <b>Atrophy<sup>B</sup></b>                         |                        |                   |                      |                        |                   |                      |
| absent/mild (n=25)                                 | 5<br>(20%)             | 20<br>(80%)       | n.s.                 | 4<br>(16%)             | 21<br>(84%)       | n.s.                 |
| moderate/severe (n=8)                              | 0<br>(0%)              | 8<br>(100%)       |                      | 1<br>(12%)             | 7<br>(88%)        |                      |

<sup>A</sup> For two cases classified as *H. pylori* positive by histology and with high anti-*H. pylori* IgG/IgA antibody titers bacteria did not grow on culture, so *cagA* status could not be determined. <sup>B</sup> Only *H. pylori* infected individuals were included in this analysis. <sup>C</sup> Statistical significance was determined using the Fisher's exact test, n.s.-non significant.

## Supplementary Figure 1

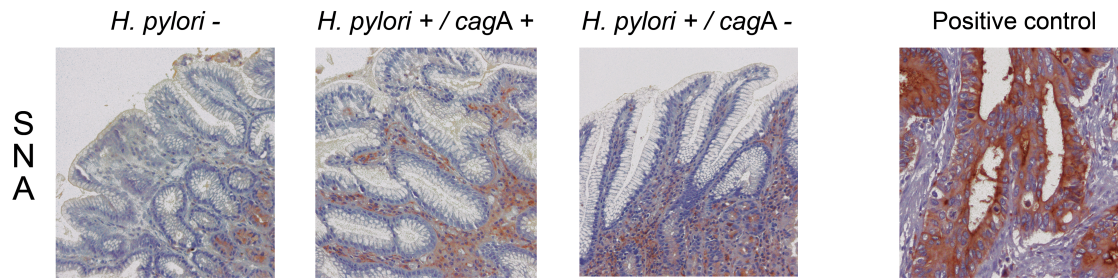

**Supplementary Figure 1 – Evaluation of  $\alpha$ 2,6 sialylated antigens expression in *H. pylori* chronically infected human gastric mucosa (A)** Histochemical detection of  $\alpha$ 2,6 sialylated antigens using the *Sambucus nigra* lectin (SNA) in paraffin-embedded sections of human gastric mucosa from non-infected individuals (*H. pylori*-) and individuals infected with either *cagA*-positive (*H. pylori*+/*cagA*+) or *cagA*-negative (*H. pylori*+/*cagA*-) strains. A colon carcinoma sample was included as positive control  
Magnification 200x
